# Supplementary material for: First Detection of SARS-CoV-2 B.1.617.2 (Delta) Variant of Concern in a Symptomatic Cat in Spain
Source: Front Vet Sci. 2022 Apr 1;9:841430. doi: 10.3389/fvets.2022.841430 (PMC9011004; doi:10.3389/fvets.2022.841430)
Supplement: Supplementary file 1 [file Data_Sheet_1.XLSX]

## Sheet: Hoja1
Accession ID	Originating Laboratory	Submitting Laboratory	Authors
EPI_ISL_2940290	Laboratorio Central, Ministerio de Salud Córdona	Instituto de Patologia Vegetal (CIAP-INTA) on behalf of 'Proyecto Argentino Interinstitucional de genomica de SARS-CoV-2' (PAIS Consortium)	Barbas, G.; Castro, G.; Debat, HJ.; FD; Fernández; M; M.B.; Marquez, N.; Pisano; Re, V.
EPI_ISL_2958868	LACEN do Mato Grosso do Sul	Instituto Adolfo Lutz, Interdiciplinary Procedures Center, Strategic Laboratory	Caio Vinicius Dias Lopes; Claudia Regina Gonçalves; Claudio Tavares Sacchi; Erica Valessa Ramos Gomes; Karoline Rodrigues Campos
EPI_ISL_2970554	Laboratoire de santé publique du Québec	Laboratoire de santé publique du Québec	Guillaume Bourque; Ioannis Ragoussis; Jesse Shapiro; Mark Lathrop and Michel Roger on behalf of the CoVSeQ research group; Sandrine Moreira
EPI_ISL_2930558	IDEXX Reference Laboratories	Diagnostic Virology Laboratory, National Veterinary Services Laboratories, USDA1920 Dayton Avenue, Ames, IA 50010, USA	Emily R. Love; Kerrie M. Franzen; Mary L. Killian; Mia Torchetti; Suelee Robbe-Austerman; Tod P. Stuber
EPI_ISL_873210	Virology, Ecole Nationale Veterinaire de Toulouse	Virology, Ecole Nationale Veterinaire de Toulouse	Bessiere, P.; Cadiergues; Croville, G.; Fusade-Boyer, M.; J.-L.; Lebre, L.; M.-C. and Guerin; Walch, M.
EPI_ISL_717979	Laboratory of Microbiology and Infectious Diseases, Faculty of Veterinary Medicine, Aristotle University of Thessaloniki, UniversityCampus, 541 24, Thessaloniki, Greece	Laboratory of Biology, Department of Medicine, Democritus University of Thrace,Alexandroupolis, Greece	Bampali M.; Chaintoutis S.; Dimitriou M.; Dovas C.; Dovrolis N.; Karakasiliotis I.
EPI_ISL_789858	School of Public Health, The University of Hong Kong	School of Public Health, The University of Hong Kong	Barrs; Brackman; C.J.; Chu; D.K.W.; E.M.W.; K.W.S.; Law; P.Y.L.; Peiris, M.; Perera; R.A.P.M. and Sit; T.H.C.; Tam; To; V.R.; V.Y.T.; Yu
EPI_ISL_1358217	Department of Veterinary Science, National Institute of Infectious Diseases	Department of Veterinary Science, National Institute of Infectious Diseases	Keita Ishijima; Ken Maeda; Tsukasa Yamamoto; Yudai Kuroda
EPI_ISL_2791490	Gatuario Veterinary Clinic	Faculty of Veterinary Medicine, Universidad Peruana Cayetano Heredia	Francesca Schiaffino
EPI_ISL_699506	Diagnostic Virology Laboratory, USDA National Veterinary ServicesLaboratories	Diagnostic Virology Laboratory, USDA National Veterinary ServicesLaboratories	Akpalu, Y.; Auckland; Barton Behravesh, C.; C.M.; Davila, E.; E.R.; Fischer; Franzen; G.L.; Ghai; Hamer; I.B.; Jenkins-Moore, M.; K.M.; Killian; L.D.; Love; M.L.; Pauvolid-Correa, A.; R.R.; R.S.; Roundy; S.A.; Spengler, J.;Tang, W.; Torchetti, M.; Zecca
EPI_ISL_1315075	Texas A&M College of Veterinary Medicine & Biomedical Sciences via Wisconsin Veterinary Diagnostic Laboratory,University of Wisconsin-Madison	Diagnostic Virology Laboratory, National Veterinary Services Laboratories, USDA1920 DaytonAvenue, Ames, IA 50010, USA	Ailam Lim; Casey Barton Behravesh; Emily R. Love; Gabriel L. Hamer; Kerrie M. Franzen; Mary L. Killian; Ria R. Ghai; Sarah A. Hamer
EPI_ISL_1751196	Max von Pettenkofer Institute, Virology, National Reference Center for Retroviruses, LMU Munich	Laboratory for Functional Genome Analysis; Dept. Genomics; Gene Center of the LMU Munich	Alexander Graf; Helmut Blum; Max Muenchhoff; Oliver Keppler; Stefan Krebs
EPI_ISL_730652	University of Bari, Valenzano, Italy	Dept. Food safety, Nutrition and Veterinary Public Health, Istituto superiore di sanità	C. Buonavoglia; C. Desario; D. Buonavoglia, V.; E. Lorusso; G. Elia; G. Vaccari; I. Di Bartolo; L. De Sabato; Martella; N. Decaro; U. Agrimi
EPI_ISL_2628963	Department of Veterinary Public Health, Faculty of Veterinary Science, Chulalongkorn University, Bangkok, Thailand, Center ofExcellence for Emerging and Re-emerging Infectious Diseases in Animals, and One Health Research Cluster, Faculty ofVeterinary Science, Chulalongkorn University	Department of Veterinary Public Health, Faculty of Veterinary Science, Chulalongkorn University, Bangkok, Thailand, Center ofExcellence for Emerging and Re-emerging Infectious Diseases in Animals, and One Health Research Cluster, Faculty ofVeterinary Science, Chulalongkorn University	Boonyapisitsopa, S.; Bunpapong, N.; Chaiyawong, S.; Chamsai, E.; Charoenkul, K.; Jairak, W.;Poovorawan; Surachetpong, S.; Suwannakarn, K.; Tangwangvivat, R.; Tantilertcharoen, R.;Techakriengkrai, N.; Udom, K.; Y. and Amonsin, A.
EPI_ISL_699508	Diagnostic Virology Laboratory, USDA National Veterinary ServicesLaboratories	Diagnostic Virology Laboratory, USDA National Veterinary ServicesLaboratories	Akpalu, Y.; Auckland; Barton Behravesh, C.; C.M.; Davila, E.; E.R.; Fischer; Franzen; G.L.; Ghai; Hamer; I.B.; Jenkins-Moore, M.; K.M.; Killian; L.D.; Love; M.L.; Pauvolid-Correa, A.; R.R.; R.S.; Roundy; S.A.; Spengler, J.;Tang, W.; Torchetti, M.; Zecca
EPI_ISL_2969524	Viral Respiratory Lab, National Institute forBiomedical Research (INRB)	Pathogen Sequencing Lab, National Institute forBiomedical Research (INRB)	Allison Black; Amuri Aziza; Andrew Rambaut; Catherine Pratt; Eddy Kinganda-Lusamaki; Edith Nkwembe; Emmanuel Lokilo Lofiko; Francisca Muyembe Mawete; Ian Goodfellow; James Hadfield; Jean Claude Makangara; Jean-Jacques Muyembe Tamfum; JoshQuick; Kristian Andersen; Matthias Pauthner; Michael Wiley; Nick Loman; Placide Mbala-Kingebeni; Steve Ahuka-Mundeke; Trevor Bedford
EPI_ISL_2969962	Laboratorio Central de Epidemiologia (LCE)	Unidad de Genomica Avanzada	Alejandra Garcia-Gasca; Alejandra Hernandez-Teran; Alejandro Sanchez-Flores; Alfredo Herrera-Estrella; Alicia Ocaña-Mondragon; Andreu Comas-Garcia; Angel Gustavo Salas-Lais; Antonio Loza Roman; Bernardo Martinez-Miguel; BlancaTaboada; Brenda Irasema Maldonado-Meza; Bruno Gomez-Gil; Carla Ivon Herrera-Najera; Carlos F. Arias; Celia Boukadida; Celida Duque Molina; Celida Martinez- Rodriguez; Clara …
EPI_ISL_3050766	Department of Virus and Microbiological Special Diagnostics, Statens Serum Institut, Copenhagen, Denmark	Albertsen lab, Department of Chemistry and Bioscience, Aalborg University, Denmark	Danish Covid-19 Genome Consortia
EPI_ISL_2933972	Royal GD	Royal GD	Remco Dijkman
EPI_ISL_2955426	ZARV/NHLS, Department Medical Virology, University of Pretoria	KRISP, KZn Research Innovation and Sequencing Platform	Adriano Mendes; Amy Strydom; Emmanuel SJ; Giandhari J; Lessells R; Micheala Davids; Naidoo Y; Pillay S; Ramphal U; Sim Mayaphi and Marietjie Venter; Tegally H; Wilkinson E; de Oliveira T
EPI_ISL_2942286	HELEN JOSEPH LABORATORY	National Institute for Communicable Diseases of the National Health Laboratory Service	Amoako DG; Bhiman JN; Everatt J; Ismail A; Mahlangu B; Mnguni A; Mohale T; Ntuli N; Scheepers C
EPI_ISL_2967858	Microbiology Department. Complexo Hospitalario Universitario de Vigo	Microbiology Department. Complexo Hospitalario Universitario de Vigo	Alfaya N; Alonso I; Alvarez M; Cabrera JJ; Carballo R; Cores O; Cortizo S; Davina C; Martinez L; Mediero G; Perez S; Potel C; Regueiro B; Rey S; Vasallo FJ; del-Campo V
EPI_ISL_2967859	Microbiology Department. Complexo Hospitalario Universitario de Vigo	Microbiology Department. Complexo Hospitalario Universitario de Vigo	Alfaya N; Alonso I; Alvarez M; Cabrera JJ; Carballo R; Cores O; Cortizo S; Davina C; Martinez L; Mediero G; Perez S; Potel C; Regueiro B; Rey S; Vasallo FJ; del-Campo V
EPI_ISL_2967893	Microbiology Department. Complexo Hospitalario Universitario de Vigo	Microbiology Department. Complexo Hospitalario Universitario de Vigo	Alfaya N; Alonso I; Alvarez M; Cabrera JJ; Carballo R; Cores O; Cortizo S; Davina C; Martinez L; Mediero G; Perez S; Potel C; Regueiro B; Rey S; Vasallo FJ; del-Campo V
EPI_ISL_3087909	Hospital Universitari i Politècnic La Fe de València	SeqCOVID-SPAIN consortium/IBV(CSIC)	Ana Gil Brusola; Eva González Barberá; José Luis López Hontangas and SeqCOVID-SPAIN consortium; María Dolores Gómez Ruiz; Salvador Giner Almaraz
EPI_ISL_2969651	Arizona State University	Arizona State University	Efrem S. Lim; Joshua LaBaer; Joy M. Blain; LaRinda A. Holland; Matthew F. Smith; Nicholas J. Mellor; Peter T. Skidmore; Rabia Maqsood; Valerie Harris; Vel Murugan
EPI_ISL_2968665	Houston Health Dept	Houston Health Dept	Adolpho Lara; Pamela Brown; Ryker Penn; Yanlai Lai
EPI_ISL_5846992	Viesoji istaiga Klaipedos universitetine ligonine	National Public Health Surveillance Laboratory	Ana Steponkiene; Danas Baksa; Jelena Razmuk; Lukas Vasionis; Lukas Zemaitis; Migle Gabrielaite; Svajune Muralyte
EPI_ISL_5743536	Hospital General Universitario Gregorio Marañón	Hospital General Universitario Gregorio Marañón	Cristina Rodriguez-Grande; Darío García de Viedma; Jorge Rodríguez-Grande; Julia Suárez; Laura Pérez-Lago; Marta Herranz Martin; Patricia Muñoz; Pedro Sola Campoy; Pilar Catalán; Sergio Buenestado Serrano; Victor Manuel de la Cueva
EPI_ISL_5743560	Hospital General Universitario Gregorio Marañón	Hospital General Universitario Gregorio Marañón	Cristina Rodriguez-Grande; Darío García de Viedma; Jorge Rodríguez-Grande; Julia Suárez; Laura Pérez-Lago; Marta Herranz Martin; Patricia Muñoz; Pedro Sola Campoy; Pilar Catalán; Sergio Buenestado Serrano; Victor Manuel de la Cueva
EPI_ISL_5845715	National Center of Infectious and Parasitic Diseases	National Center of Infectious and Parasitic Diseases	Alexiev et al
EPI_ISL_5743567	Hospital General Universitario Gregorio Marañón	Hospital General Universitario Gregorio Marañón	Cristina Rodriguez-Grande; Darío García de Viedma; Jorge Rodríguez-Grande; Julia Suárez; Laura Pérez-Lago; Marta Herranz Martin; Patricia Muñoz; Pedro Sola Campoy; Pilar Catalán; Sergio Buenestado Serrano; Victor Manuel de la Cueva
